# Supplementary material
Source: Springer Nature journal article supplement (https://www.springermedizin.de/resource/supplementary/12979_2006_33_MOESM1_ESM.pdf/9603212)

**CD56**

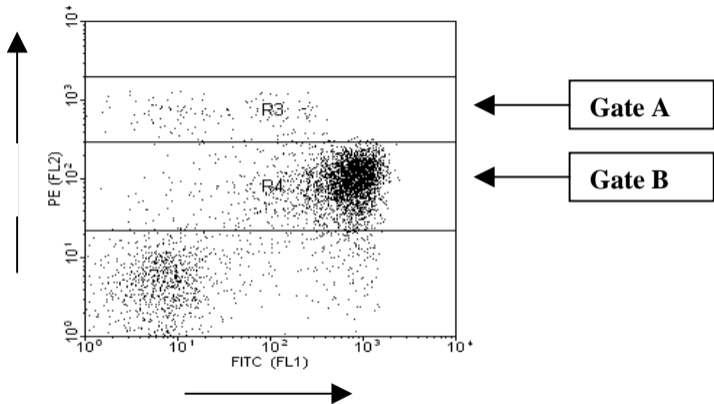

**CD16**

Supplement: MOESM1 [file 9603212]
